# Supplementary material for: Preoperative tumor embolization prolongs time to recurrence of meningiomas: a retrospective propensity-matched analysis
Source: PubMed Central journal article supplement (PMC10359541; doi:10.1136/neurintsurg-2022-019080), 2022-07-08
Supplement: neurintsurg-2022-019080supp001.pdf [file neurintsurg-2022-019080supp001.pdf]

## Supplemental figure 1

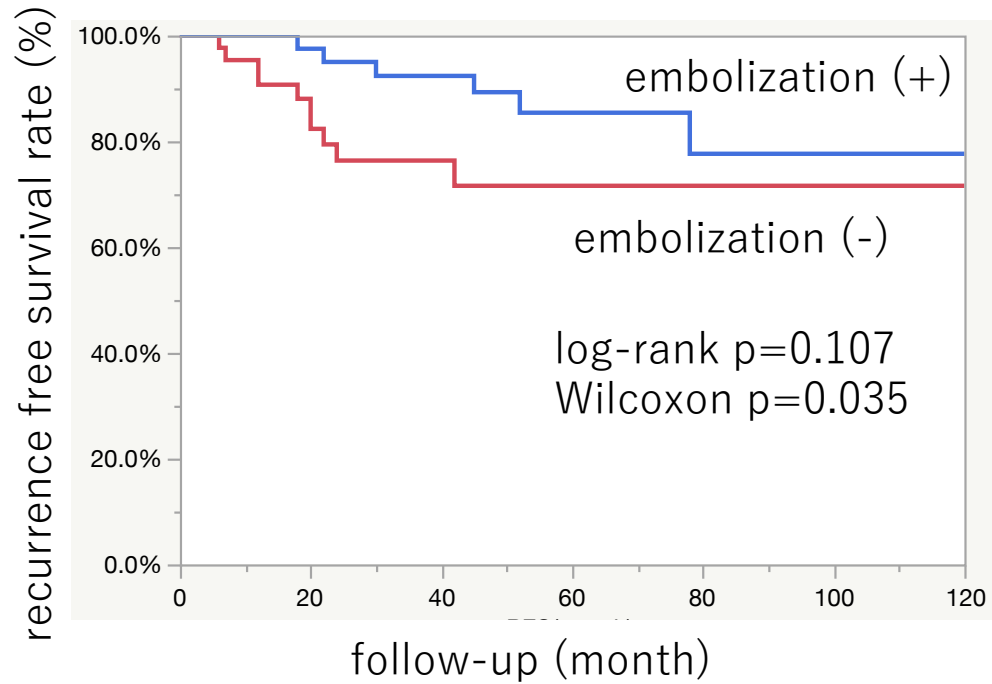

**Supplemental Fig. 1** Sensitivity analysis: Kaplan–Meier curves of time to recurrence in the propensity-matched analysis of 43 pairs

We conducted a sensitivity analysis for WHO grade 1 meningioma matching without adjustment for Simpson grade and mib-1 (Factors unknown before surgery).

Recurrence-free survival (RFS) in the preoperative embolization group vs. no-embolization group (mean RFS, 57.2 vs. 41.4 months; log-rank  $p = 0.107$ ; Wilcoxon  $p = 0.035$ ).
